# Supplementary material for: Drosophila melanogaster mitigates gastro-oral infections by stimulating pathogen expulsion
Source: Research Square preprint supplement (doi:10.21203/rs.3.rs-8473557/v1), 2026-01-13
Supplement: Supplementary file 1 [file b4442a25fcb83bb61acda75b.docx]

**Supplementary files**

B

A


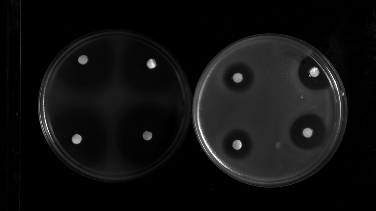

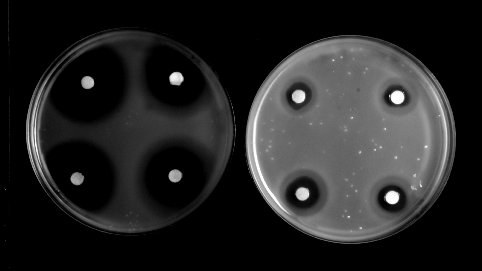

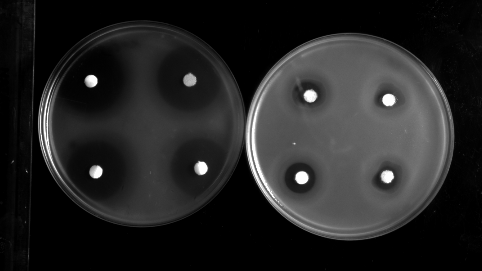

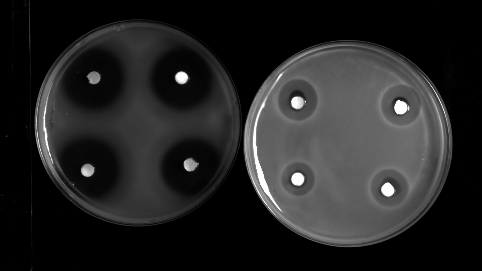


*E. coli*

*E. cloacae*

*K. pneumoniae*


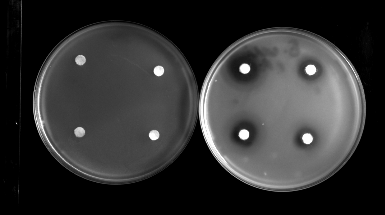

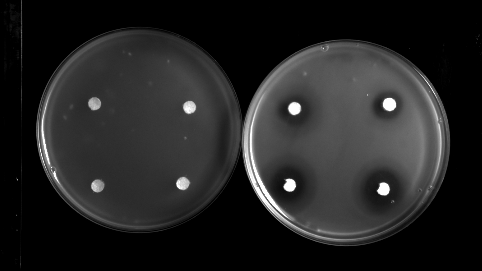

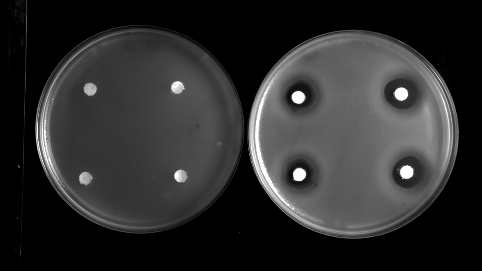

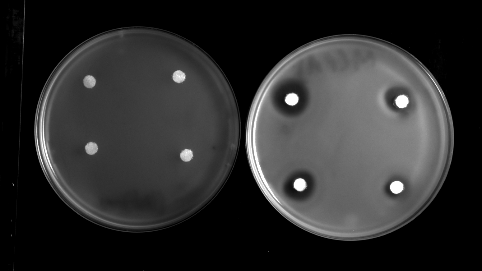


*E. coli*

*S.* Typhimurium

*E. cloacae*

*K. pneumoniae*

*S.* Typhimurium

**Supplementary file 1.** Antibacterial activity of preservatives (Nipagin/Propionic Acid) present in fly food against *E. coli*, *S*. Typhimurium, *S. marcescens, K. pneumoniae and E. cloacae* using agar overlay method. **(A)** Nipagin (left petri plate: control - 5 µL methanol on each disc; right petri plate: 5 µL Nipagin on each disc) **(B)** Propionic Acid (left petri plate: control - 50 µg chloramphenicol; right petri plate: 5 µL of Propionic acid on each disc).


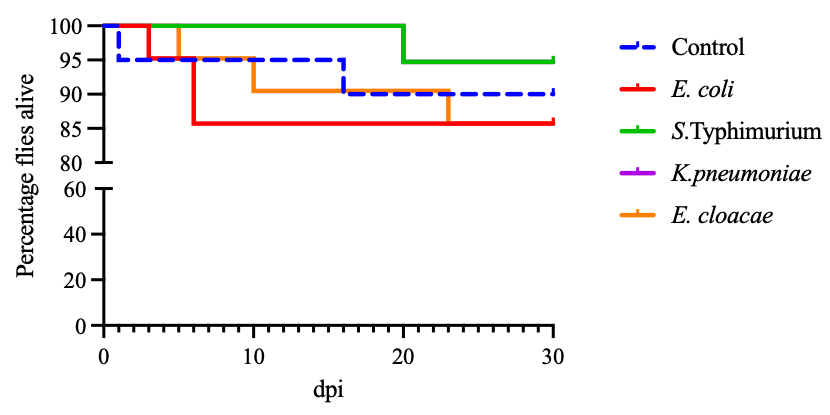


**Supplementary file 2. Kaplan–Meier survival curve depicting the percentage survival of infected flies over time.** The y-axis represents survival probability after infection, while the x-axis indicates days post-infection (dpi), with survival assessed upto 30 dpi. Each curve corresponds to flies infected with a specific bacterial strain.

| **Sample/infection group** | **Mean** | **Standard Deviation (SD)** |
| --- | --- | --- |
| Control | 97.6 | ±5.103 |
| *E. coli* | 90.82 | ±6.642 |
| *S*. Typhimurium | 91.07 | ±1.84 |
| *K. pneumoniae* | 101.56 | ±6.796 |
| *E. cloacae* | 100.07 | ±9.771 |

**Supplementary file 3. No significant difference in survival was observed between *Duox* RNAi flies and their respective control, *Actin-gfp* flies.** Data represent the survival relative to the *actin-gfp* flies.


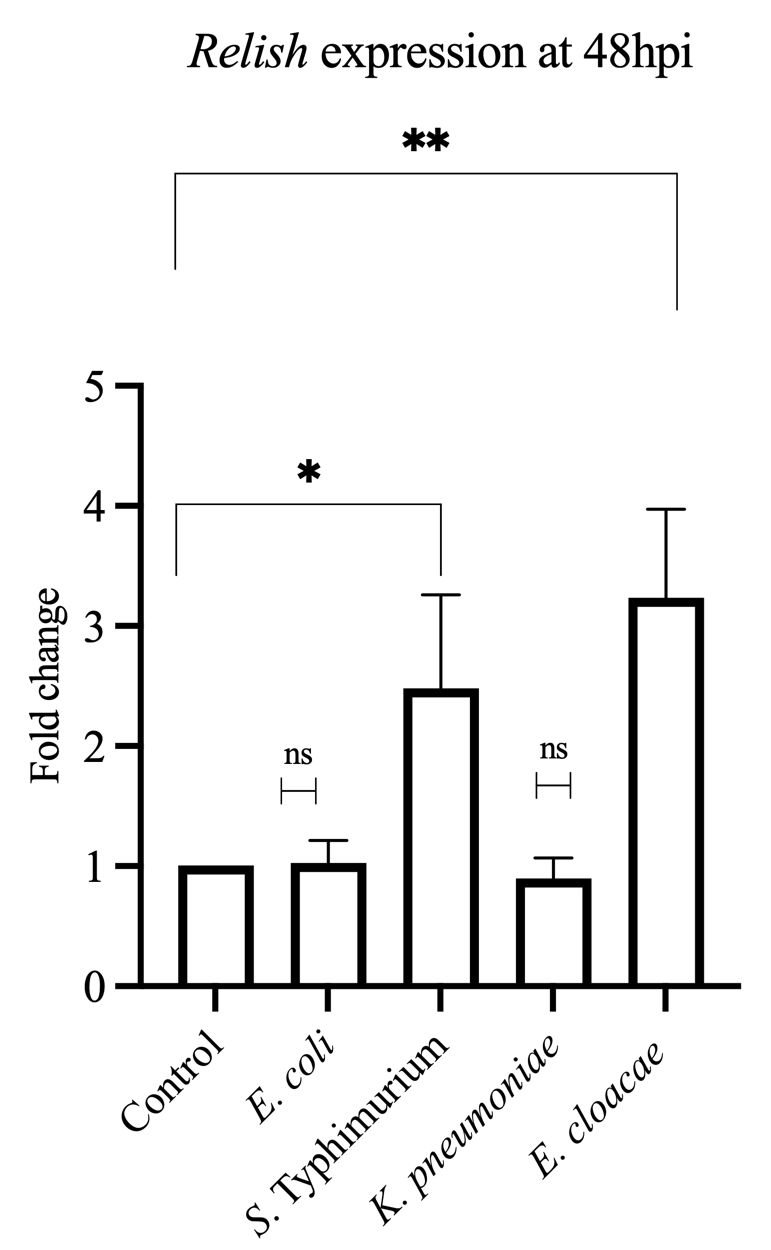


**Supplementary file 4. Pathogen-Specific induction of *Relish* in *Drosophila* following infection.** mRNA transcript levels of *Relish* at 48 hours post-infection (hpi). Relative expression was calculated against control gut samples. Each biological replicate consisted of 15 adult flies. Data is represented as the mean ± SD from three independent biological replicates. Significance levels are denoted as follows *, p < 0.05; **, p < 0.01 and ns, not significant.

Control

*S.* Typhimurium

*E. cloacae*


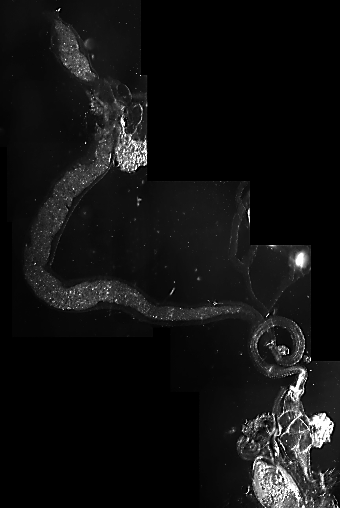

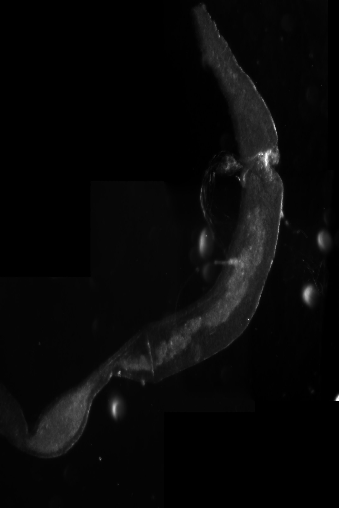

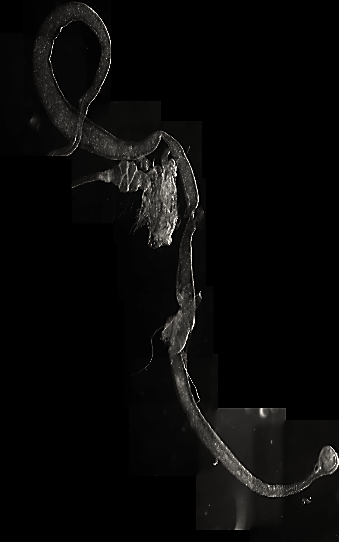


Control

*S.* Typhimurium

*E. cloacae*

**Supplementary file 5. Representative DIC images of *S*. Typhimurium- and *E. cloacae*-infected fly guts at 24 hpi showing narrowing of the gut lumen.**

**Supplementary file 6. Primer pairs used for gene expression analysis, listed with their sequences.**

| **Gene name** | **Primer** | **Primer sequence (5′–3′)** |
| --- | --- | --- |
| *RP49* | Reverse | GCGGGTGCGCTTGTTCGATCC |
| Forward | CCAAGGACTTCATCCGCCACC |
| *Cecropin* | Reverse | GCTTCCGATTGTCCAATGCT |
| Forward | CAGTCGCTCAGTTTCCACAG |
| *Defensin* | Reverse | GCAGTAGCCGCCTTTGAACC |
| Forward | CGCATAGAAGCGAGCCACATG |
| *Relish* | Reverse | TGCCATGTGGAGTGATTAT |
| Forward | TCCTTAATGGAGTGCCAACC |
| *TRPA1* | Reverse | AATATCCTGAAGGGGCTGTCA |
| Forward | GGGTCCCAAGCGGATTGAAAT` |
| *Duox* | Reverse | CGCTGTTTCTCGGTCTGACT |
| Forward | AGCCCTGCTGCTTCTACTGA |
| *Nox* | Reverse | GTCTTCTTGATGCTGCGTATGC |
| Forward | GCCGCAAACTGATTTCCTG |
